# Supplementary material for: Exposure Assessment to Respirable Free Silica in Coal Mining Areas: A Health Risk Assessment Approach
Source: Research Square preprint supplement (doi:10.21203/rs.3.rs-7308663/v1), 2025-08-13
Supplement: Supplementary file 1 [file feb1c9fb795743e38b6fd0e2.pdf]

## **Supporting Information**

### **Exposure Assessment to Respirable Free Silica in Coal Mining Areas: A Health Risk Assessment Approach**

Manish Yadav<sup>a,b,c\*</sup>, Nitin Kumar Singh<sup>d</sup>, Sumit Saha<sup>a,b\*</sup>

<sup>a</sup>Materials Chemistry and Interfacial Engineering Department, CSIR-Institute of Minerals & Materials Technology, Bhubaneswar, Odisha 751013, India

<sup>b</sup>Academy of Scientific and Innovative Research (AcSIR), Ghaziabad, Uttar Pradesh 201002, India

<sup>c</sup>Environment Department, Central Mine Planning and Design Institute – RI (VII), Bhubaneswar, Odisha 751013, India

<sup>d</sup>Department of Chemical Engineering, Marwadi University, Rajkot, Gujarat 360003, India

\*Corresponding author: Sumit Saha, E-mail address: [sumitsaha.immt@csir.res.in](mailto:sumitsaha.immt@csir.res.in), and Manish Yadav, E-mail address: [manish.yadav@coalindia.in](mailto:manish.yadav@coalindia.in)

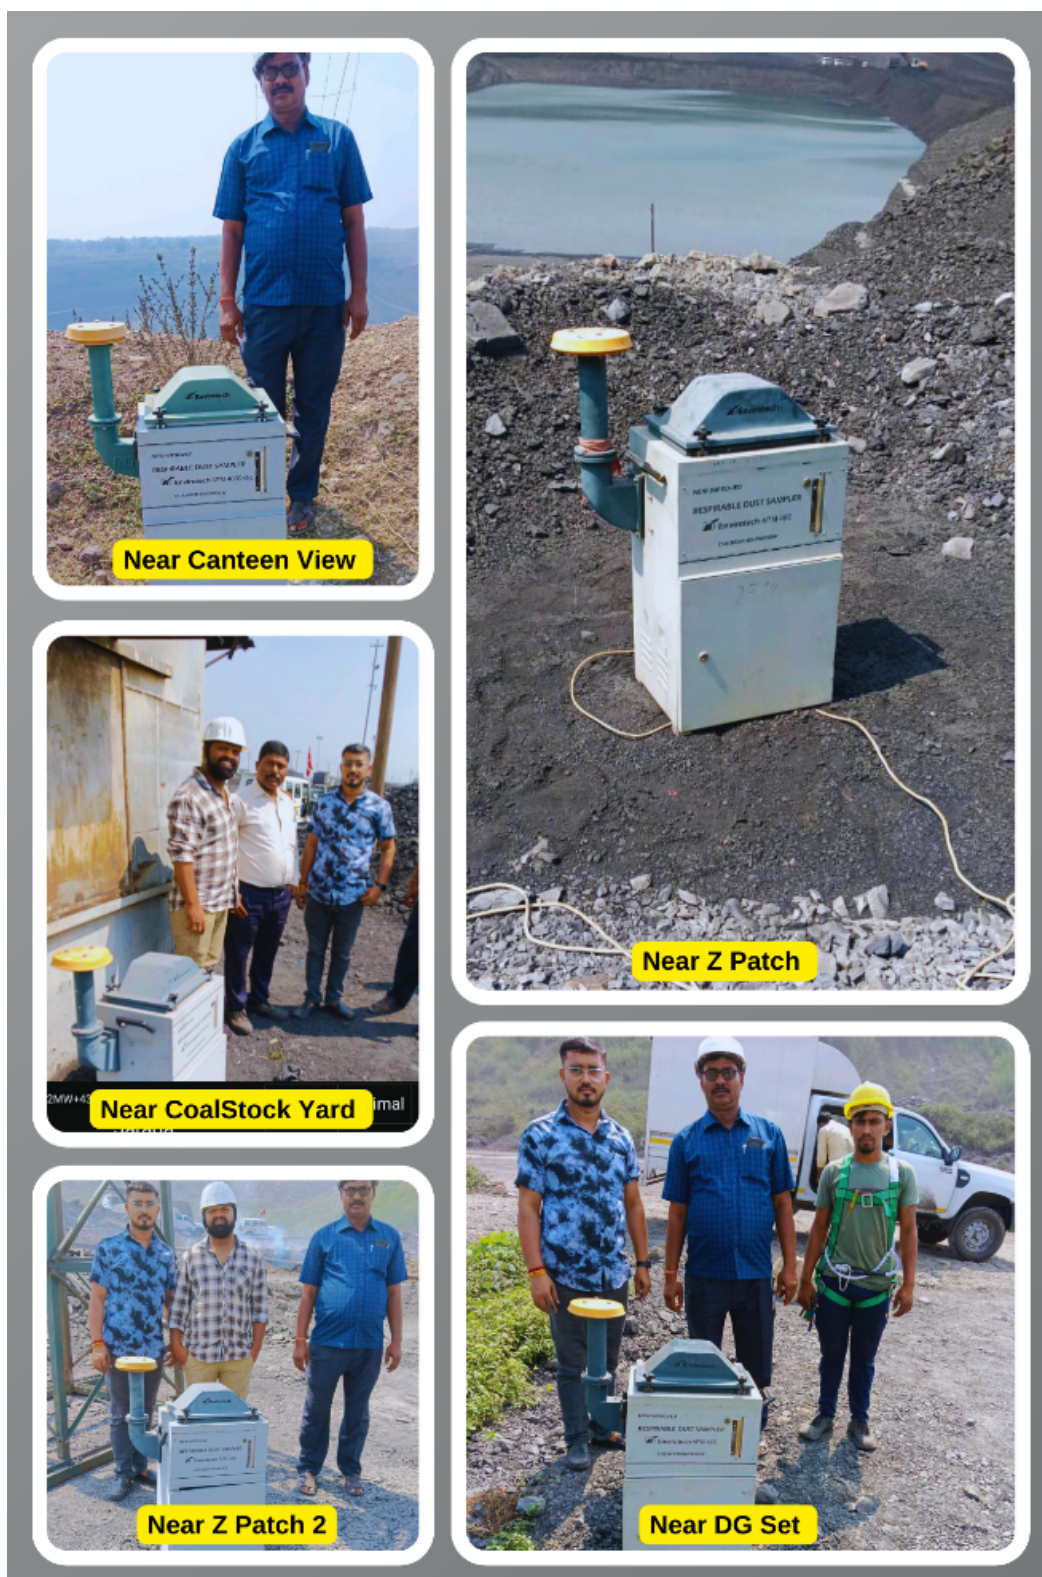

**Fig. S1.** Monitoring location picture of Kaniha OCP.

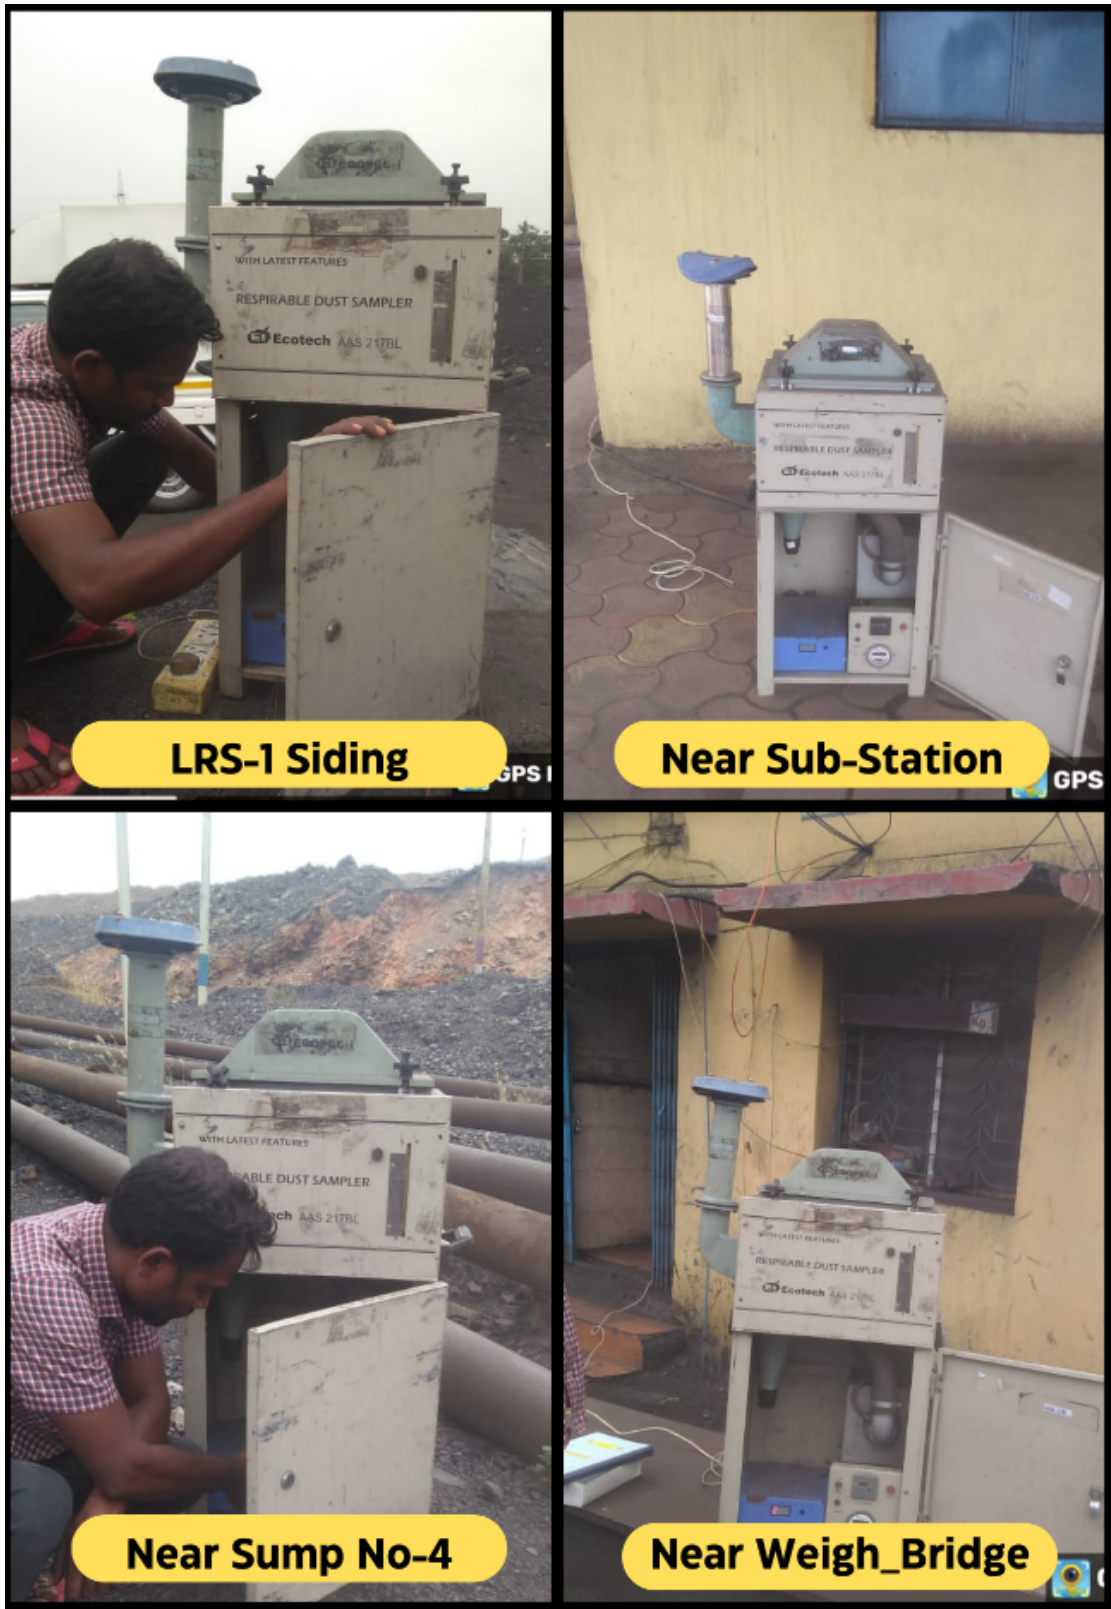

Fig. S2. Monitoring location picture of Lingaraj OCP.



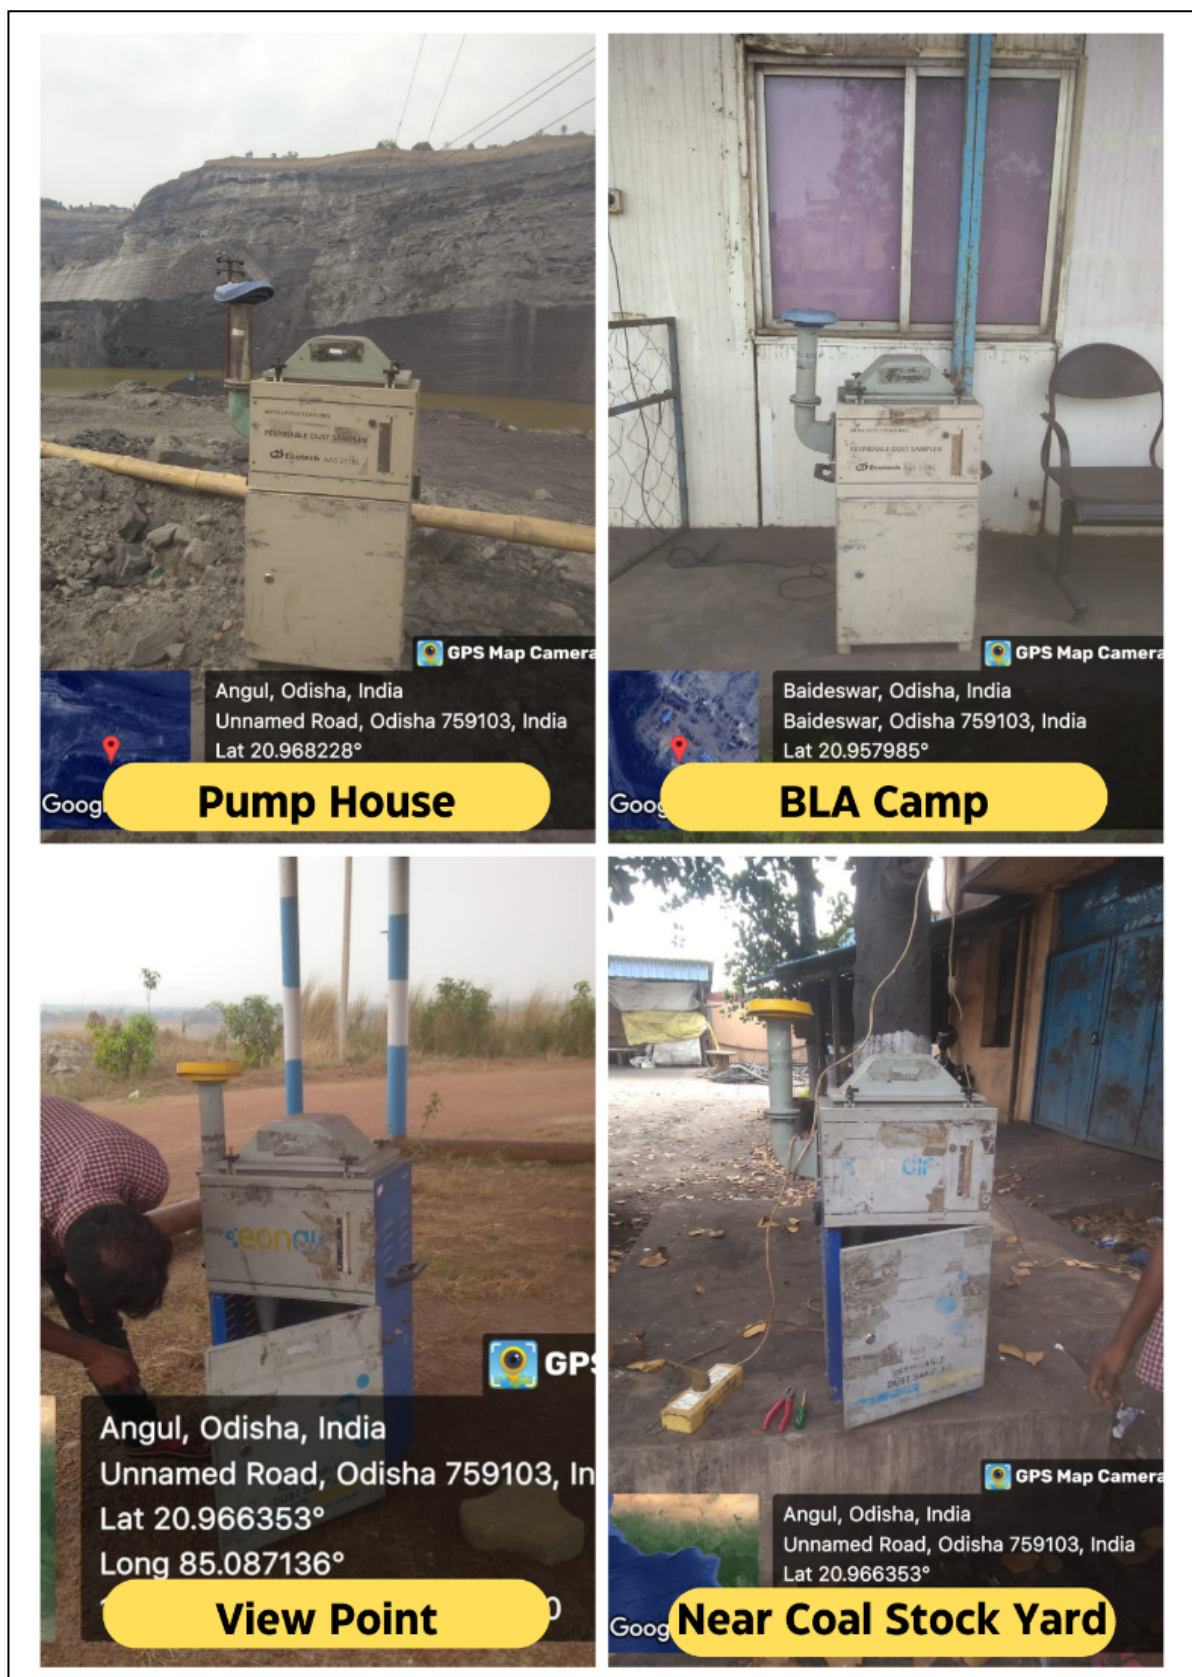

**Fig. S3.** Monitoring location picture of Bharatpur OCP.



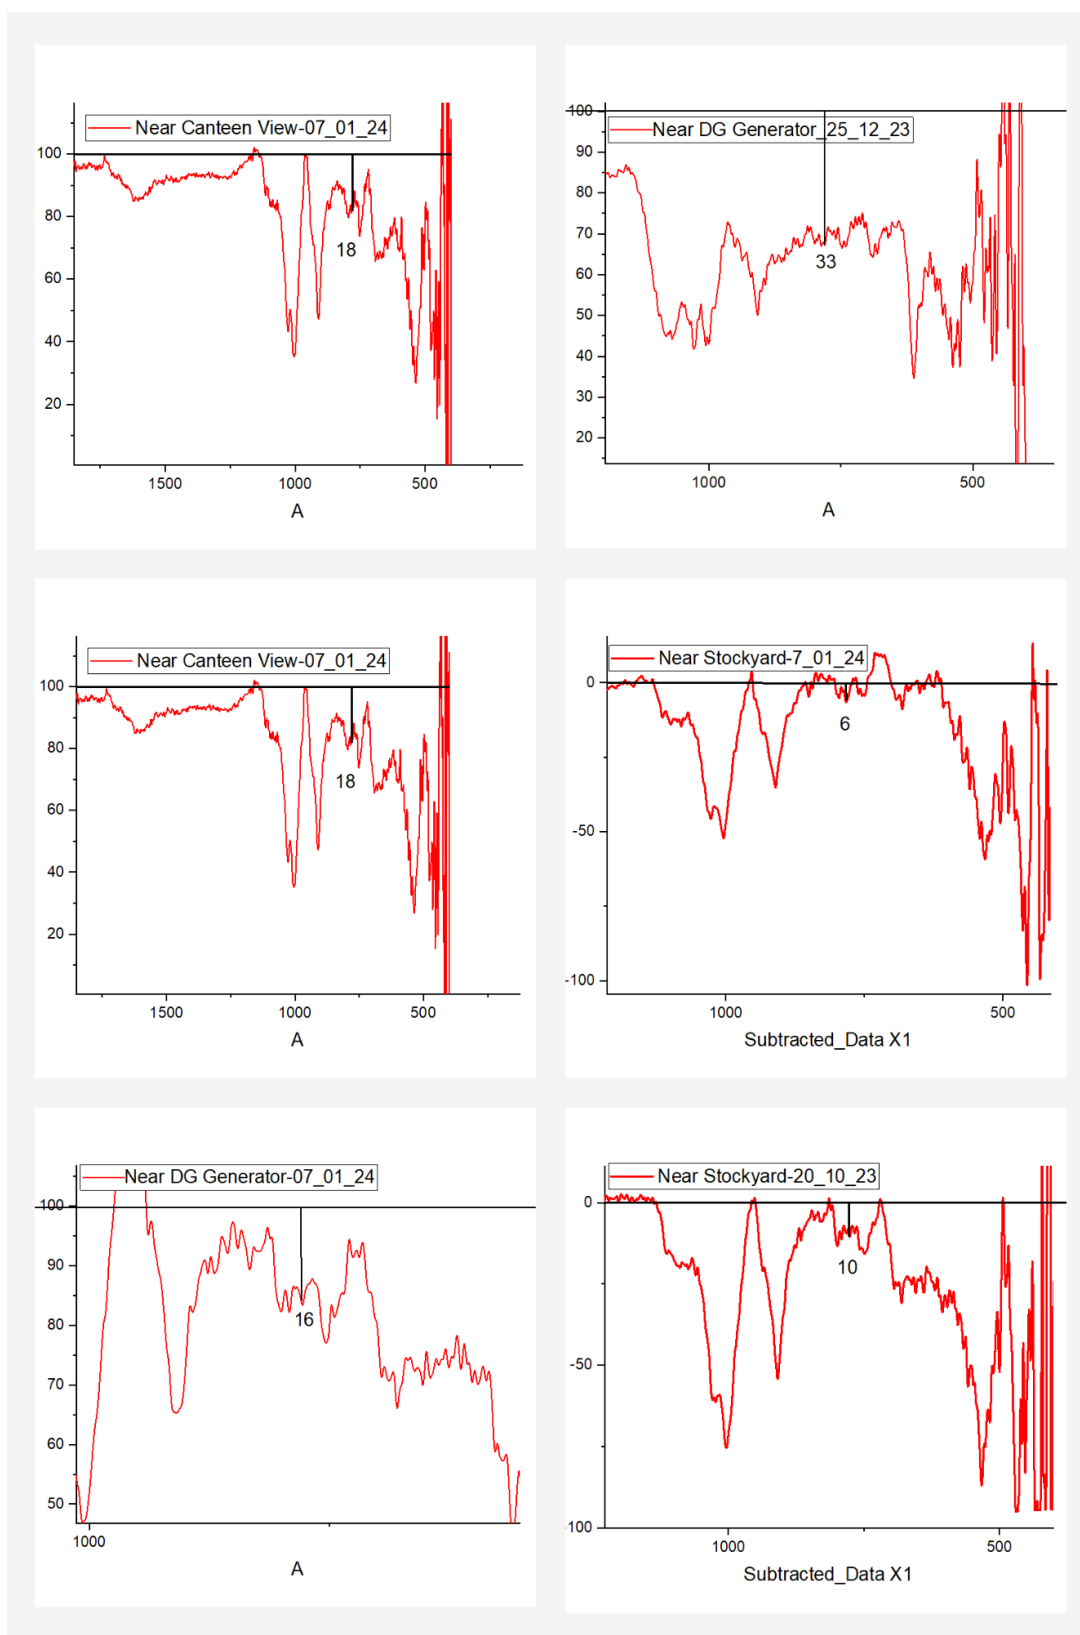

**Fig. S4.** FTIR peaks for some of the samples of Kaniha OCP.

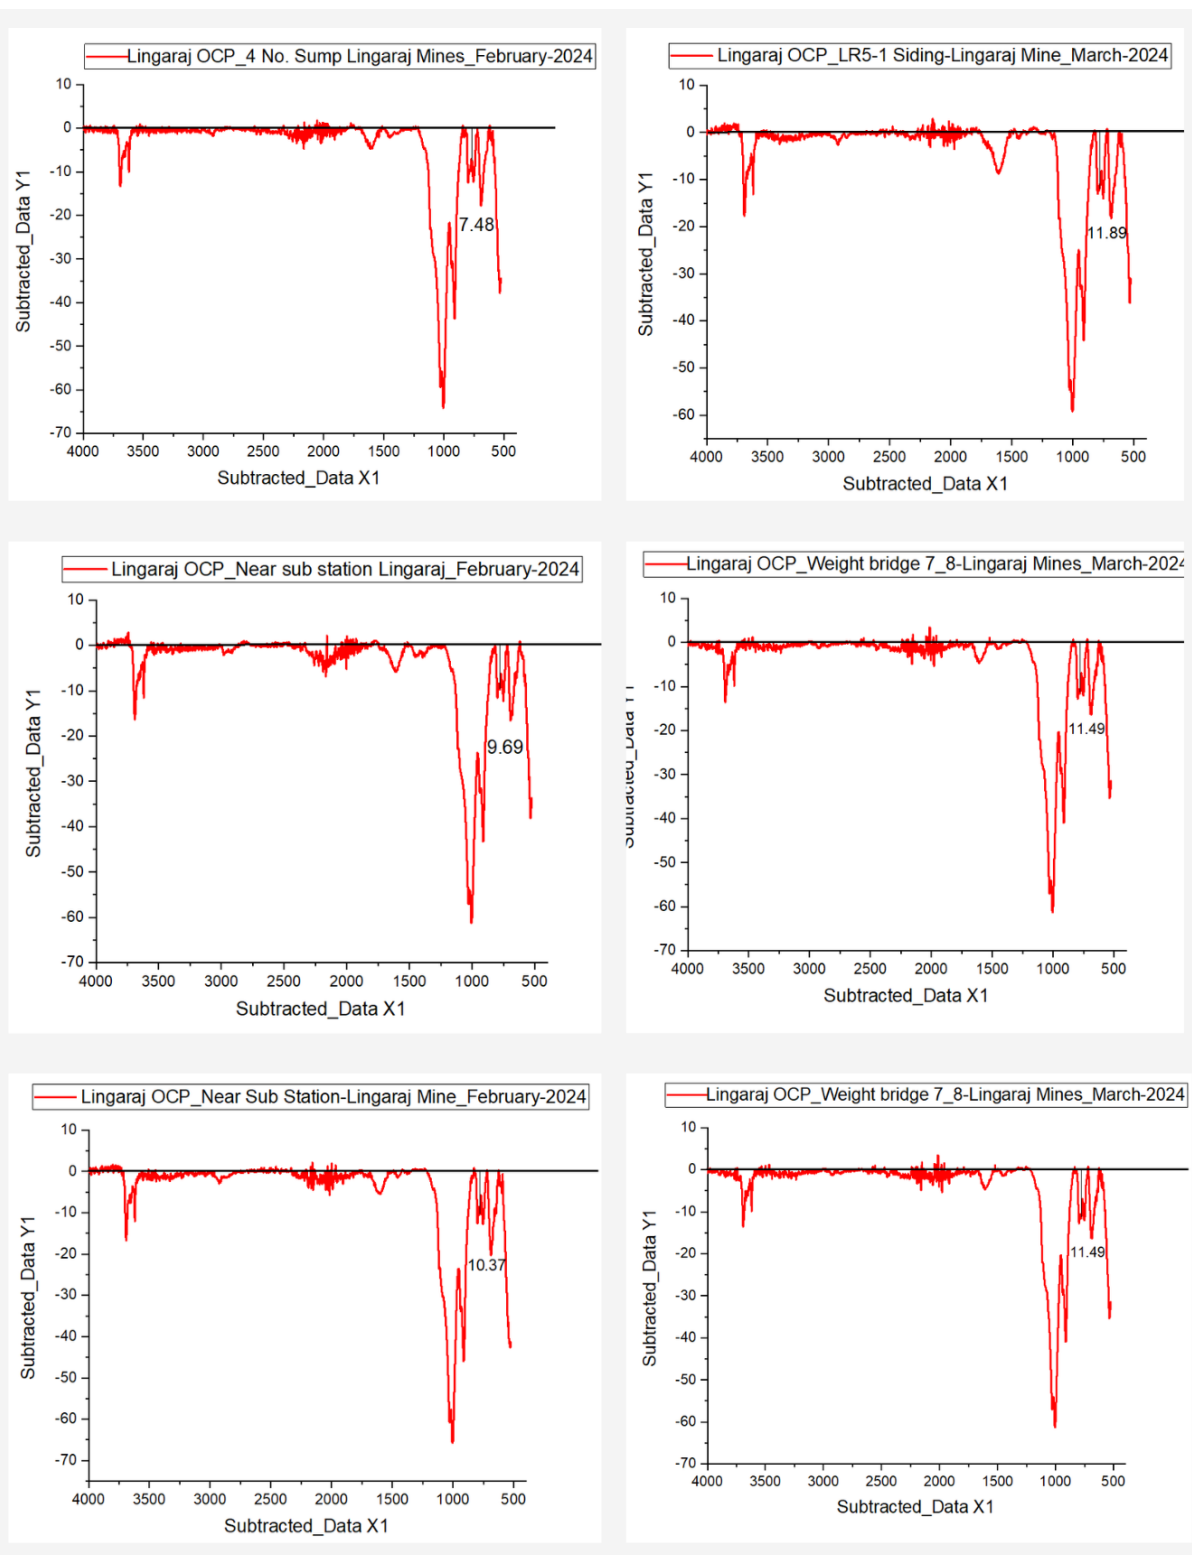

**Fig. S5.** FTIR peaks for some of the samples of Lingaraj OCP.

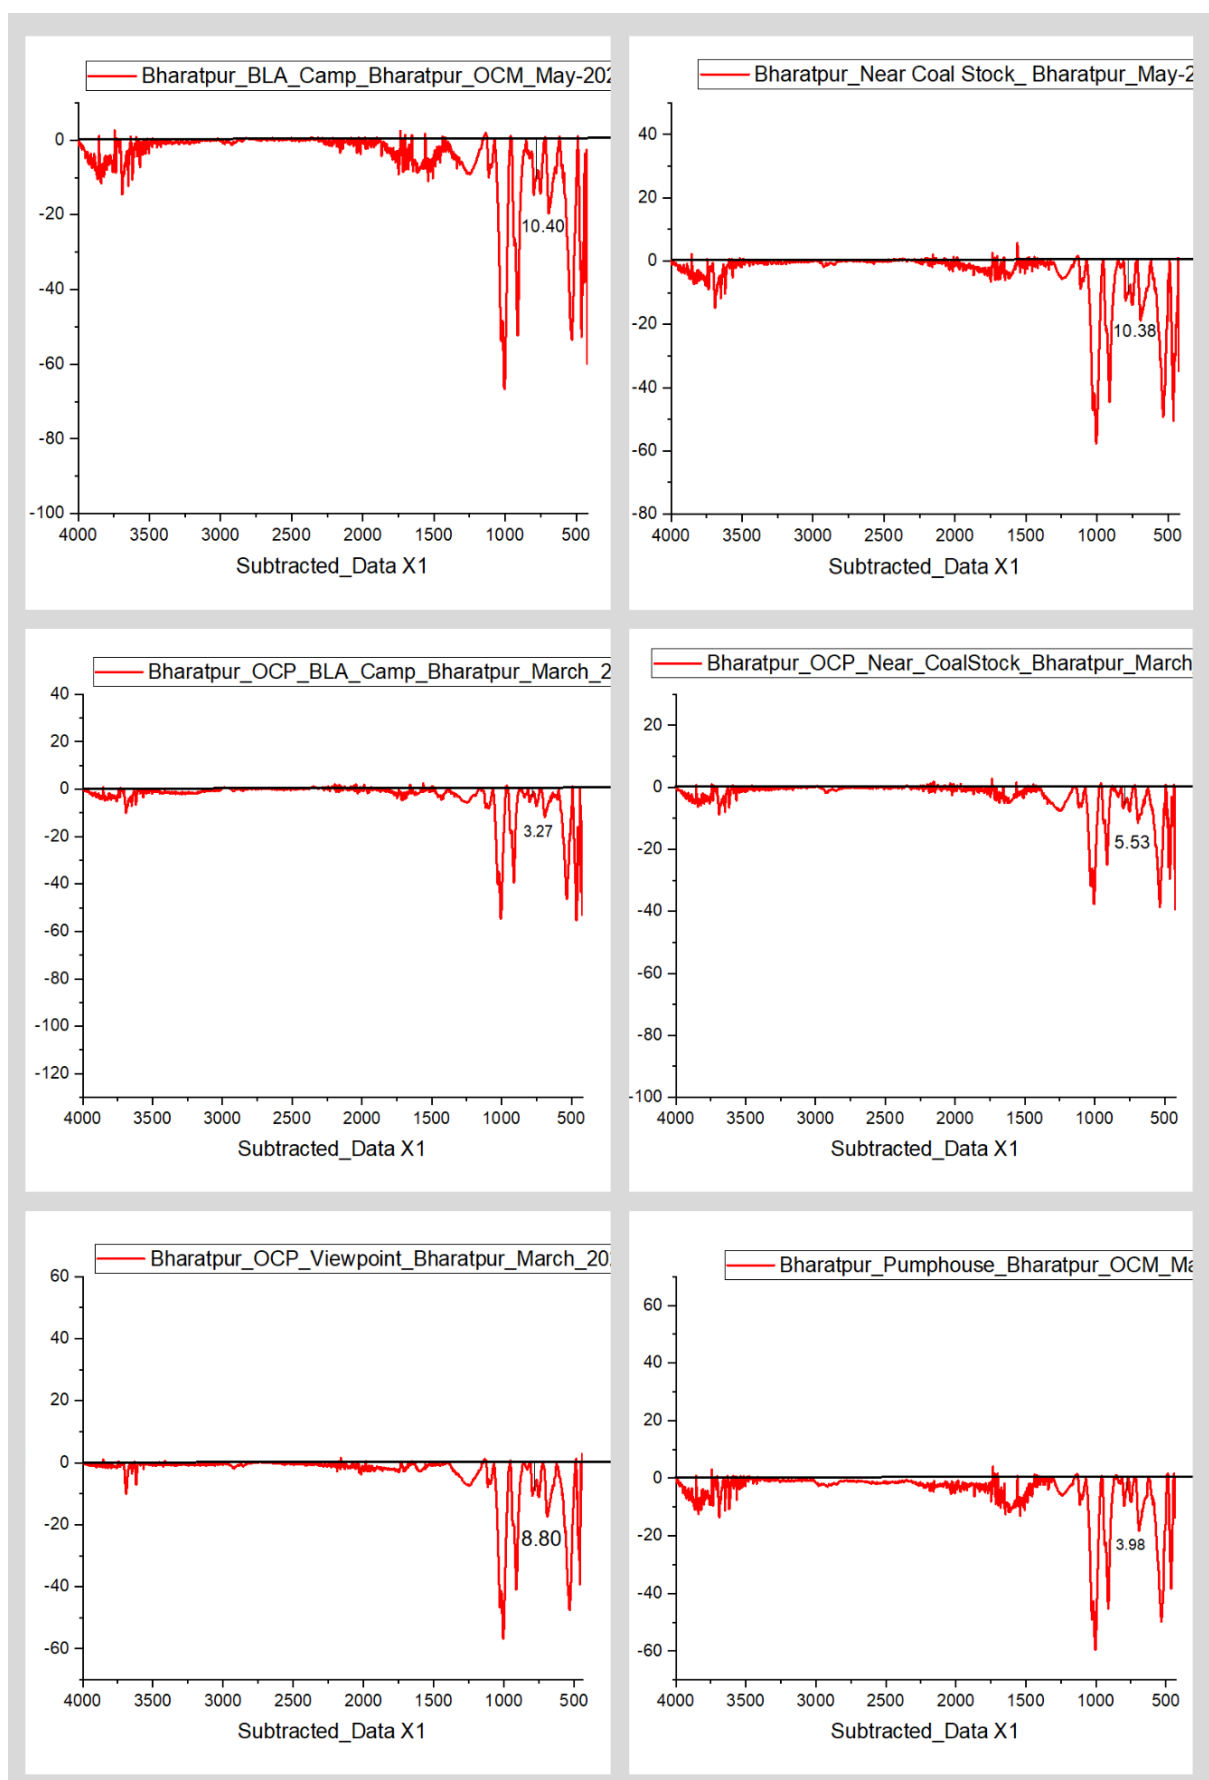

**Fig. S6.** FTIR peaks for some of the samples of Bharatpur OCP.



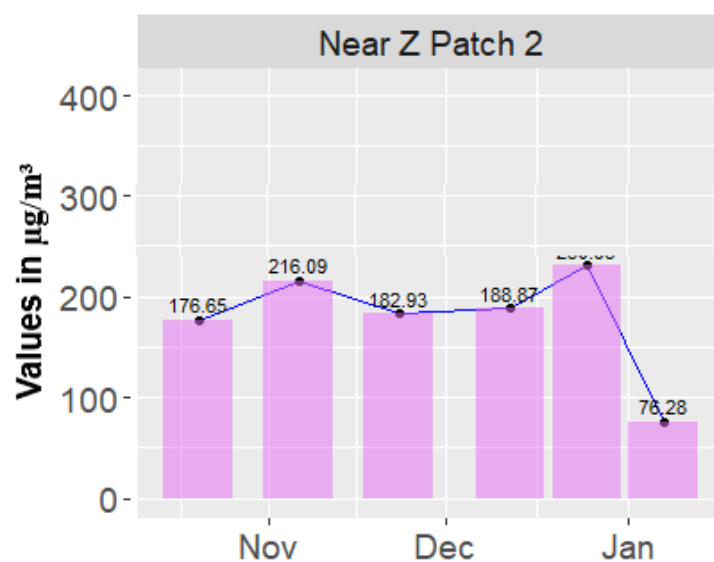

**Fig. S7.** PM<sub>10</sub> in µg/m<sup>3</sup> for Near Z patch 2.

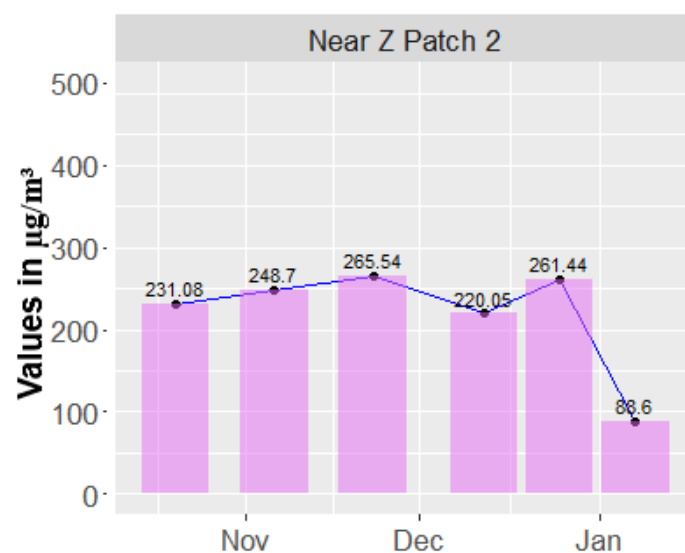

**Fig. S8.** SPM PM<sub>10</sub> in µg/m<sup>3</sup> for Near Z patch 2.

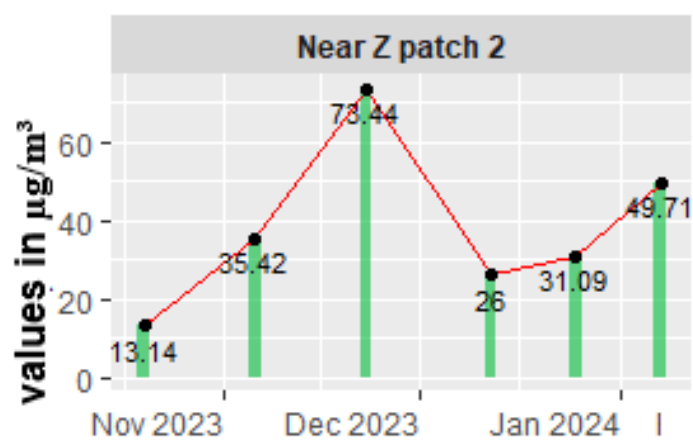

**Fig. S9.** Free Silica in µg/m<sup>3</sup> for Near Z patch 2.

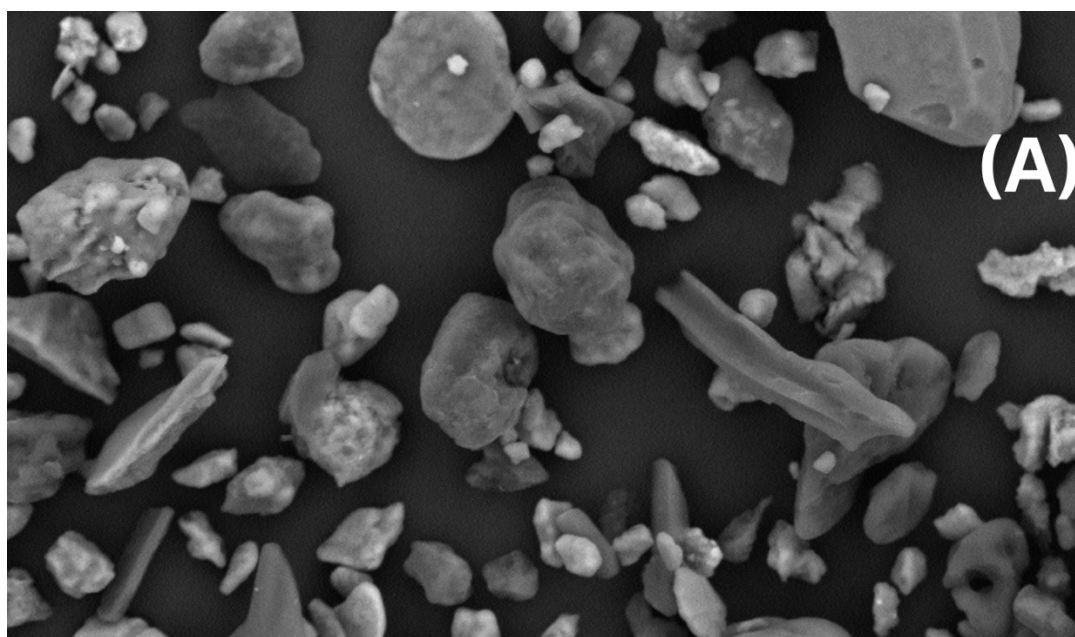

2  $\mu$ m EHT = 20.00 kV Signal A = HDBSD Date: 19 Apr 2024  
H WD = 8.89 mm Mag = 5.00 K X Time: 15:33:51

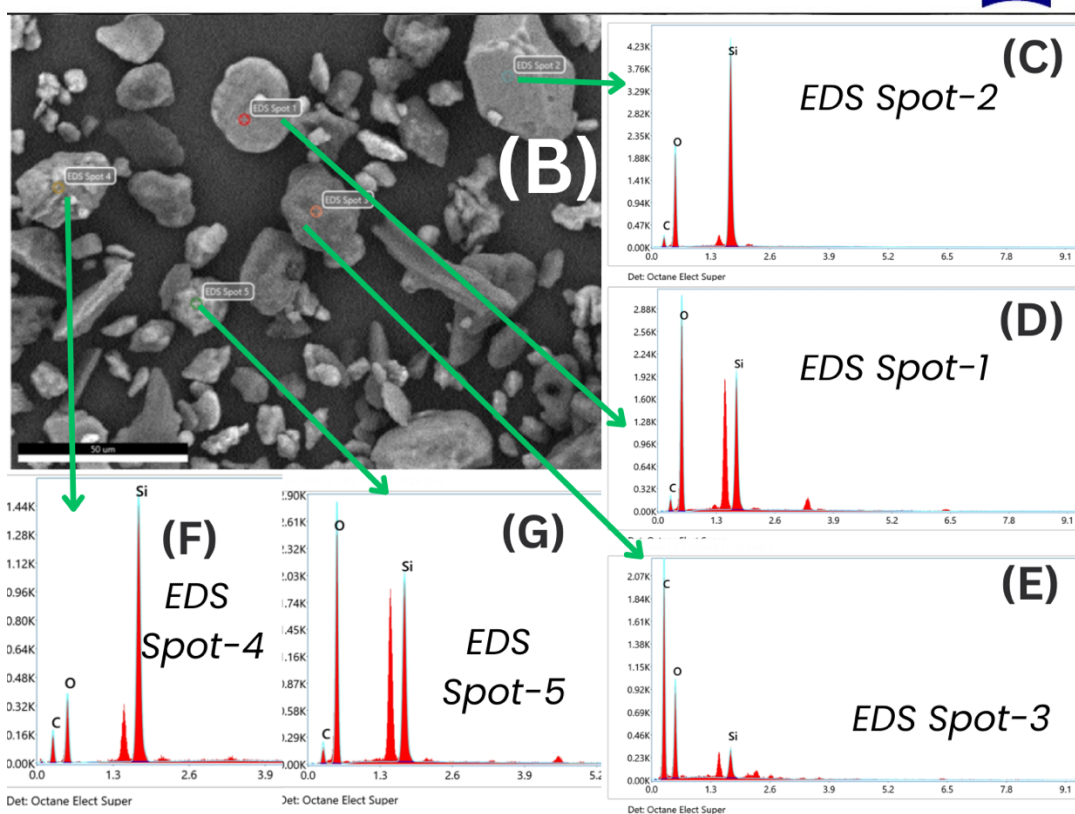

**Fig. S10.** SEM-EDS for the Near Z patch of the Kaniha OCP.

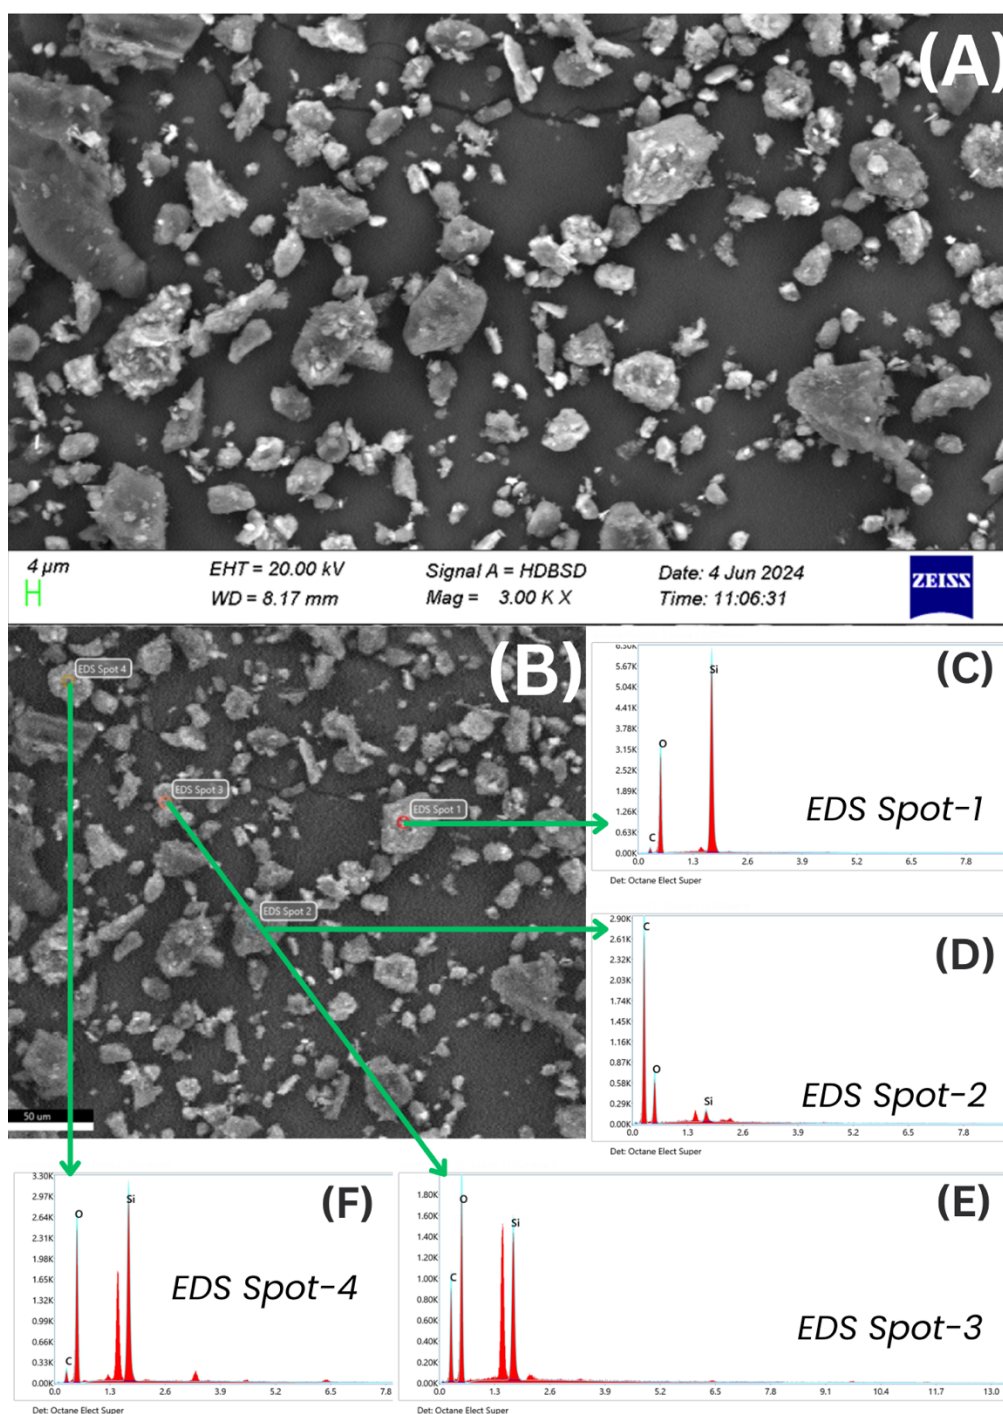

**Fig. S11.** SEM-EDS for Near Sump no. 4 of the Lingaraj OCP.



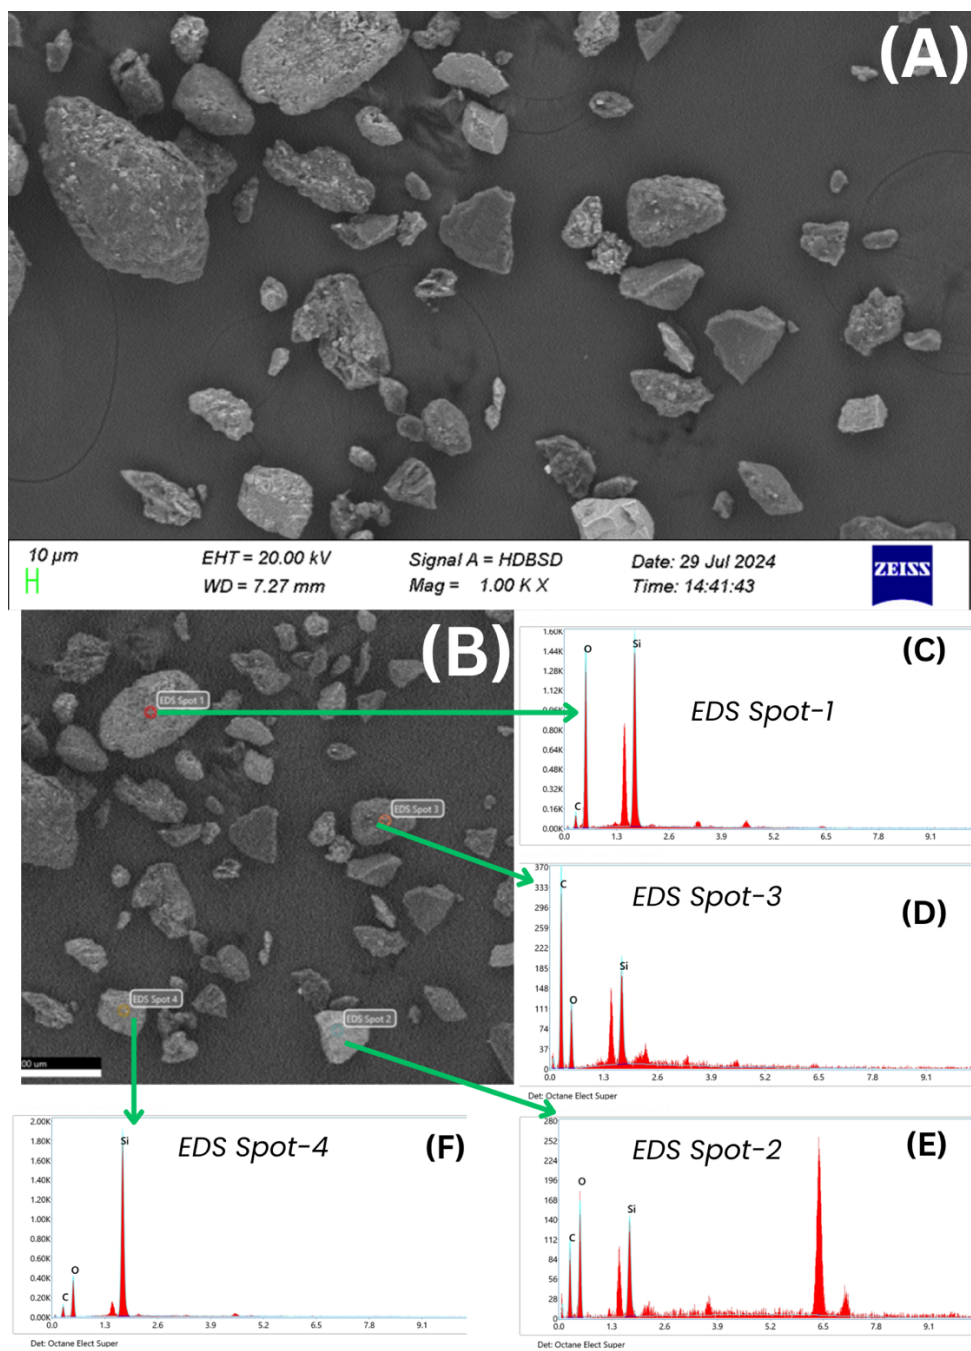

**Fig. S12.** SEM-EDS for BLA Camp of the Bharatpur OCP.

**Table S1.** Mineralogical Composition of a Borewell from Kaniha, Lingaraj, and Bharatpur OCP.

| Sl. No. | Sample Details | SiO <sub>2</sub> | Al <sub>2</sub> O <sub>3</sub> | Fe <sub>2</sub> O <sub>3</sub> | Na <sub>2</sub> O | K <sub>2</sub> O | CaO  | MgO   | TiO <sub>2</sub> | P <sub>2</sub> O <sub>5</sub> | SO <sub>3</sub> | Undeter-mined | Total |
|---------|----------------|------------------|--------------------------------|--------------------------------|-------------------|------------------|------|-------|------------------|-------------------------------|-----------------|---------------|-------|
|         |                | (%)              | (%)                            | (%)                            | (%)               | (%)              | (%)  | (%)   | (%)              | (%)                           | (%)             | (%)           | (%)   |
| 1.      | Kaniha OCP     | <b>64.43</b>     | 26.47                          | 0.865                          | 0.413             | 2.33             | 1.3  | 1.684 | 1.1              | 0.056                         | 0.62            | 0.749         | 100   |
| 2.      | Lingaraj OCP   | <b>63.20</b>     | 28.50                          | 2.99                           | 0.55              |                  | 0.89 | -     | 1.33             | 1.40                          | <0.01           | 1.44          | ~100  |
| 3.      | Bharatpur OCP  | <b>60.2</b>      | 29.1                           | 5.2                            | 0.4               |                  | 1.16 | 0.9   | 1.16             | 0.7                           | 0.3             | -             | ~100  |
